# Supplementary material for: Probabilistic graphical models relate immune status with response to neoadjuvant chemotherapy in breast cancer
Source: PubMed Central journal article supplement (PMC6021258; doi:10.18632/oncotarget.25496), 2018-06-12
Supplement: oncotarget-09-27586-s001.pdf [file oncotarget-09-27586-s001.pdf]

# Probabilistic graphical models relate immune status with response to neoadjuvant chemotherapy in breast cancer

## SUPPLEMENTARY MATERIALS

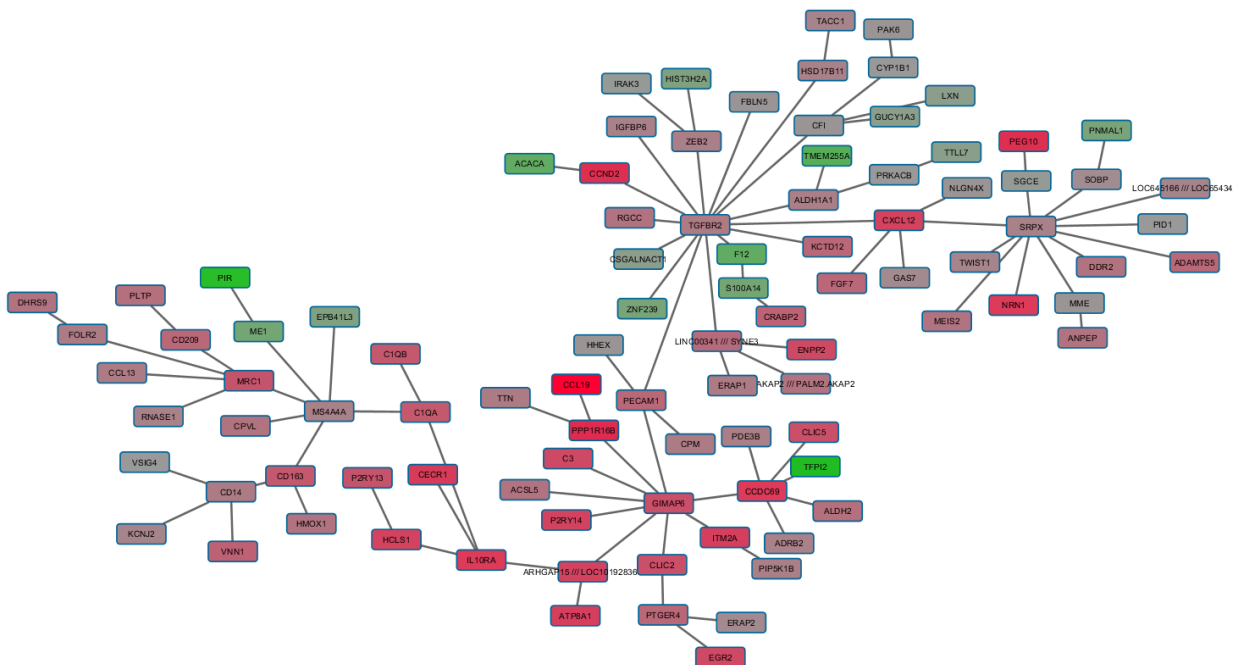

**Supplementary Figure 1: Detail of “Immune response (MHCII)” (node 9) in Complete Response tumors.** Genes with an expression below 0 were represented in green; genes with an expression around 0 were represented in grey and genes with an expression above zero were represented in red.

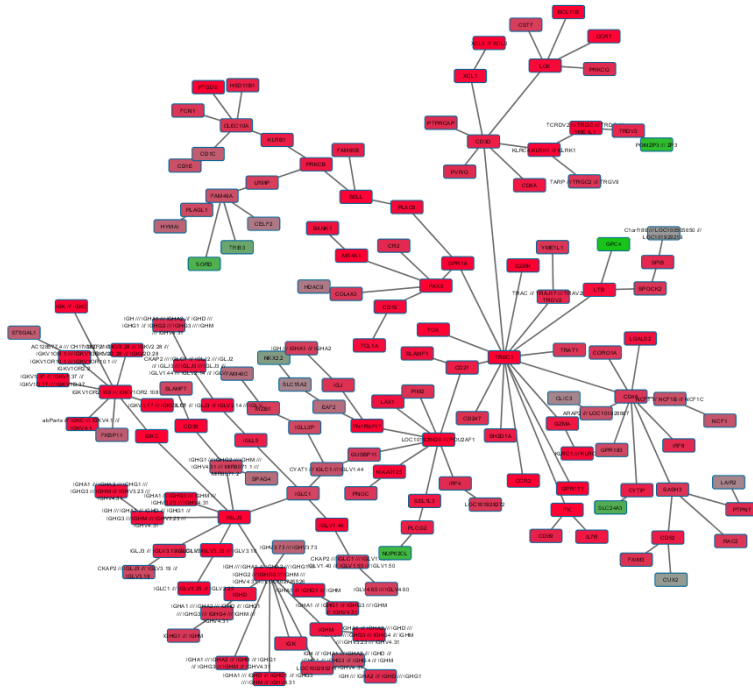

**Supplementary Figure 2: Detail of “Immune response (B cell)” (node 11) in Complete Response tumors.** Genes with an expression below 0 were represented in green; genes with an expression around 0 were represented in grey and genes with an expression above zero were represented in red.

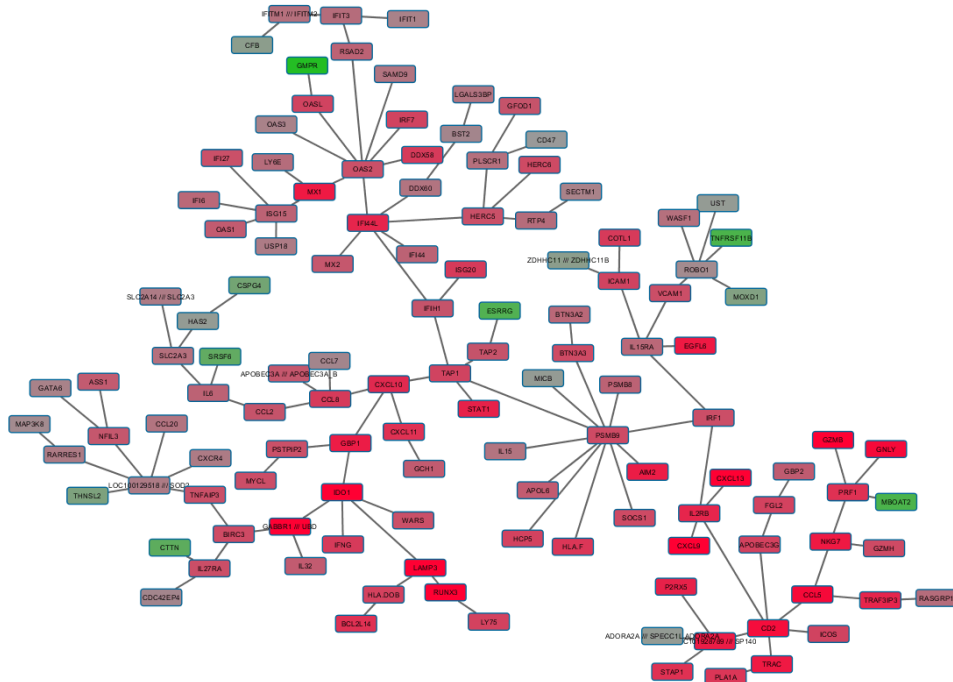

**Supplementary Figure 3: Detail of “Immune response (Interferon)” (node 12) in Complete Response tumors.** Genes with an expression below 0 were represented in green; genes with an expression around 0 were represented in grey and genes with an expression above zero were represented in red.

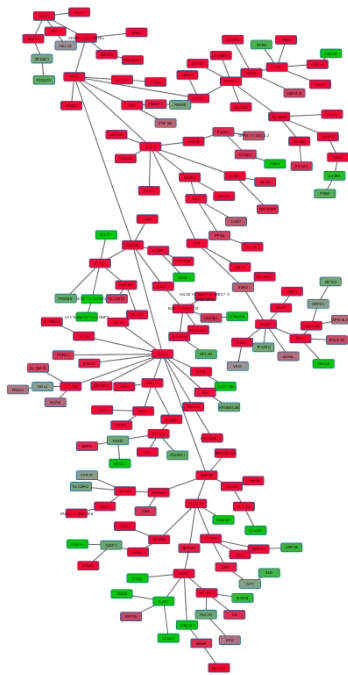

**Supplementary Figure 4: Detail of “Cell Cycle 1” (node 17) in Progressive Disease tumors.** Genes with an expression below 0 were represented in green; genes with an expression around 0 were represented in grey and genes with an expression above zero were represented in red.

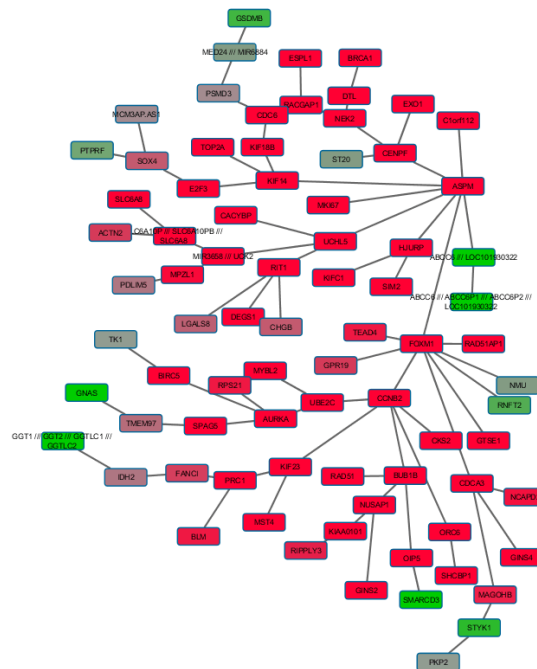

**Supplementary Figure 5: Detail of “Cell Cycle 2 (node 18) in Progressive Disease tumors.** Genes with an expression below 0 were represented in green; genes with an expression around 0 were represented in grey and genes with an expression above zero were represented in red.
